# Supplementary material
Source: Springer Nature journal article supplement (https://www.springermedizin.de/resource/supplementary/12936_2008_616_MOESM6_ESM.pdf/9547834)

**a**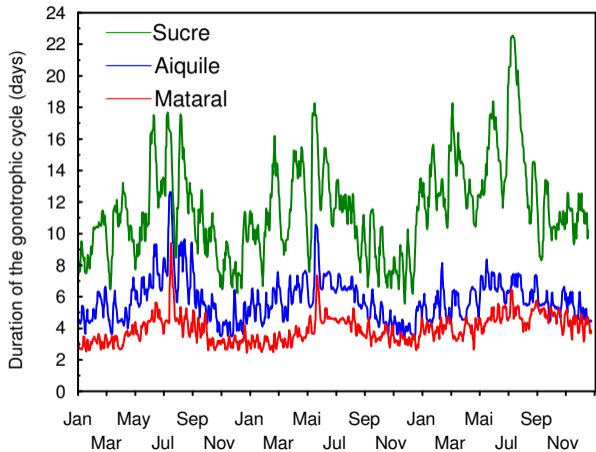**b**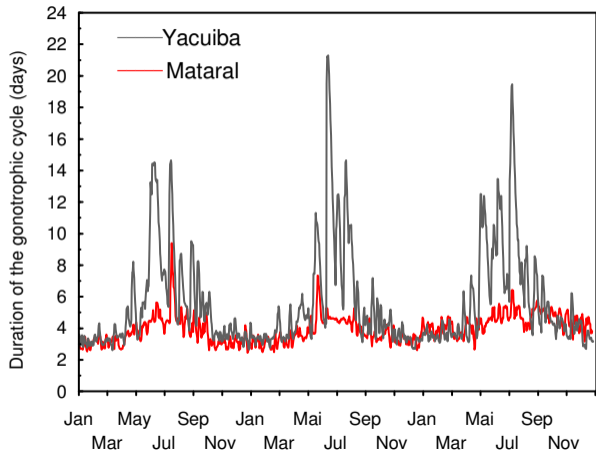

Supplement: MOESM6 [file 9547834]
